# Supplementary material for: Neoadjuvant radiotherapy in the approach of locally advanced breast cancer
Source: PubMed Central journal article supplement — ESMO Open. 2020 Apr 15;5(2):e000640. doi: 10.1136/esmoopen-2019-000640 (PMC7082639; doi:10.1136/esmoopen-2019-000640), 2020-04-15
Supplement: esmoopen-2019-000640supp001.pdf [file esmoopen-2019-000640supp001.pdf]

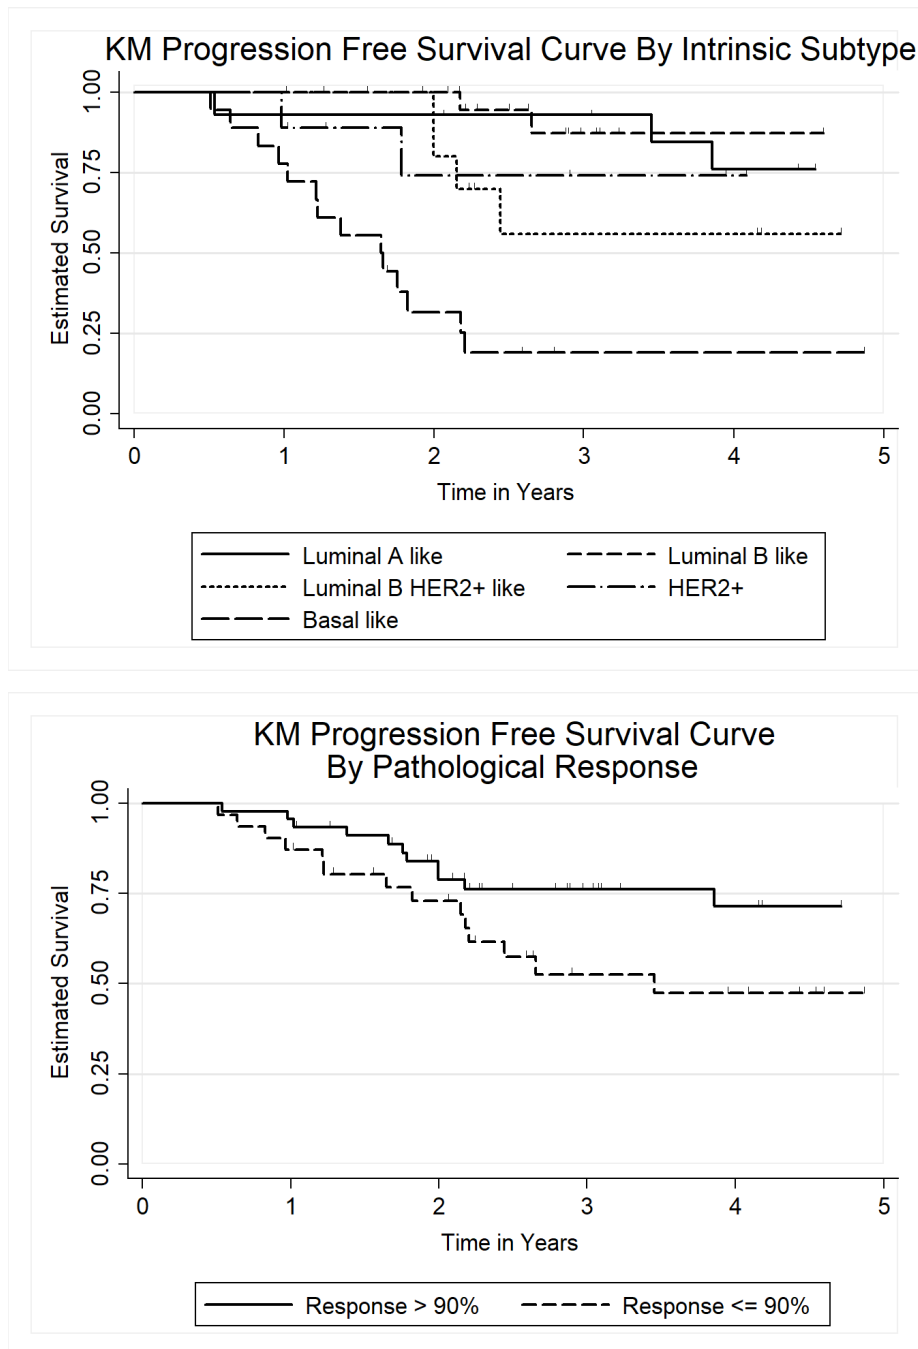

Figure 1: progression-free survival by intrinsic subtype and pathological response

| Time (years)                | Survivor Function | Standard Error | 95% Confidence Interval |
|-----------------------------|-------------------|----------------|-------------------------|
| <b>Luminal A like</b>       |                   |                |                         |
| 1                           | 0.9286            | 0.0688         | 0.5908 – 0.9896         |
| 3                           | 0.9286            | 0.0688         | 0.5908 – 0.9896         |
| 5                           | 0.7597            | 0.1218         | 0.4223 – 0.9161         |
| <b>Luminal B like</b>       |                   |                |                         |
| 1                           | 1.0000            | -              | -                       |
| 3                           | 0.8718            | 0.0858         | 0.5716 – 0.9669         |
| 5                           | 0.8718            | 0.0858         | 0.5716 – 0.9669         |
| <b>Luminal B HER2+ like</b> |                   |                |                         |
| 1                           | 1.0000            | -              | -                       |
| 3                           | 0.5600            | 0.1706         | 0.1971 – 0.8130         |
| 5                           | 0.5600            | 0.1706         | 0.1971 – 0.8130         |
| <b>HER2+</b>                |                   |                |                         |
| 1                           | 0.8889            | 0.1048         | 0.4330 – 0.9836         |
| 3                           | 0.7497            | 0.1610         | 0.2892 – 0.9300         |
| 5                           | 0.7407            | 0.1610         | 0.2892 – 0.9300         |
| <b>Basal like</b>           |                   |                |                         |
| 1                           | 0.7778            | 0.0980         | 0.5110 – 0.9102         |
| 3                           | 0.1905            | 0.0971         | 0.0483 – 0.4035         |
| 5                           | -                 | -              | -                       |

| Time (years)             | Survivor Function | Standard Error | 95% Confidence Interval |
|--------------------------|-------------------|----------------|-------------------------|
| <b>Response &gt; 90%</b> |                   |                |                         |
| 1                        | 0.9556            | 0.0307         | 0.8338 – 0.9887         |
| 3                        | 0.7607            | 0.0665         | 0.5996 – 0.8640         |
| 5                        | 0.7132            | 0.0775         | 0.5302 – 0.8352         |
| <b>Response ≤ 90%</b>    |                   |                |                         |
| 1                        | 0.8710            | 0.0602         | 0.6919 – 0.9495         |
| 3                        | 0.5266            | 0.0981         | 0.3219 – 0.6957         |
| 5                        | 0.4739            | 0.1015         | 0.2698 – 0.6533         |
