# Supplementary material for: Neoadjuvant radiotherapy in the approach of locally advanced breast cancer
Source: PubMed Central journal article supplement — ESMO Open. 2020 Apr 15;5(2):e000640. doi: 10.1136/esmoopen-2019-000640 (PMC7082639; doi:10.1136/esmoopen-2019-000640), 2020-04-15
Supplement: esmoopen-2019-000640supp003.pdf [file esmoopen-2019-000640supp003.pdf]

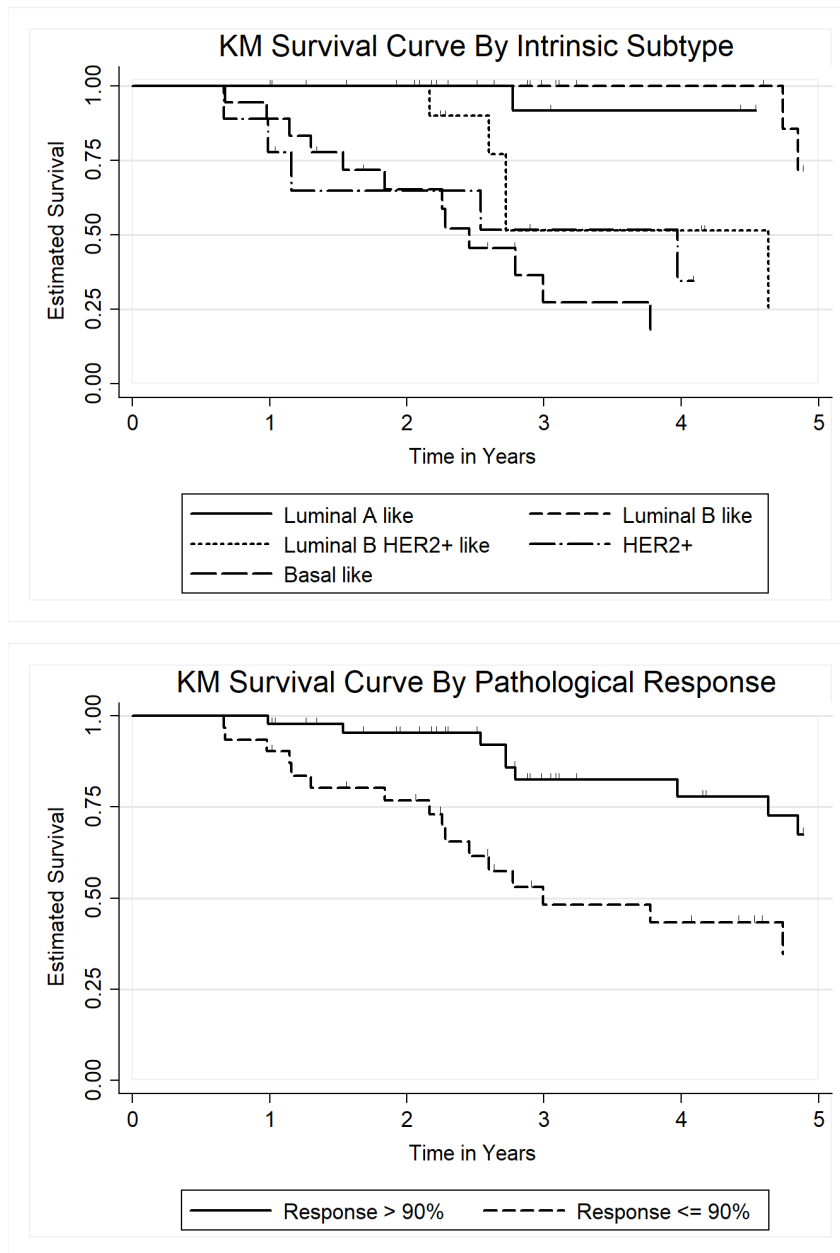

Figure 3: overall survival by intrinsic subtype and pathological response

| Time (years)                | Survivor Function | Standard Error | 95% Confidence Interval |
|-----------------------------|-------------------|----------------|-------------------------|
| <b>Luminal A like</b>       |                   |                |                         |
| 1                           | 1.0000            | -              | -                       |
| 3                           | 0.9167            | 0.0798         | 0.5390 – 0.9878         |
| 5                           | 0.9167            | 0.0798         | 0.4223 – 0.9878         |
| <b>Luminal B like</b>       |                   |                |                         |
| 1                           | 1.0000            | -              | -                       |
| 3                           | 1.0000            | -              | -                       |
| 5                           | 0.7143            | 0.1707         | 0.2582 – 0.9198         |
| <b>Luminal B HER2+ like</b> |                   |                |                         |
| 1                           | 1.0000            | -              | -                       |
| 3                           | 0.5143            | 0.1769         | 0.1600 – 0.7856         |
| 5                           | 0.2571            | 0.2022         | 0.0146 – 0.6462         |
| <b>HER2+</b>                |                   |                |                         |
| 1                           | 0.7778            | 0.1386         | 0.3648 – 0.9393         |
| 3                           | 0.5185            | 0.1759         | 0.1641 – 0.7877         |
| 5                           | 0.3457            | 0.1835         | 0.0591 – 0.6710         |
| <b>Basal like</b>           |                   |                |                         |
| 1                           | 0.8889            | 0.0741         | 0.6242 – 0.9710         |
| 3                           | 0.2741            | 0.1249         | 0.0758 – 0.5225         |
| 5                           | 0.1828            | 0.1118         | 0.0320 – 0.4320         |

| Time (years)             | Survivor Function | Standard Error | 95% Confidence Interval |
|--------------------------|-------------------|----------------|-------------------------|
| <b>Response &gt; 90%</b> |                   |                |                         |
| 1                        | 0.9778            | 0.0220         | 0.8525 – 0.9968         |
| 3                        | 0.8250            | 0.0659         | 0.6477 – 0.9183         |
| 5                        | 0.6753            | 0.4520         | 0.4520 – 0.8236         |
| <b>Response ≤ 90%</b>    |                   |                |                         |
| 1                        | 0.9032            | 0.0531         | 0.7293 – 0.9677         |
| 3                        | 0.4824            | 0.0995         | 0.2810 – 0.6580         |
| 5                        | 0.3473            | 0.1118         | 0.1465 – 0.5586         |
