# Supplementary figures and images for: Neoadjuvant radiotherapy in the approach of locally advanced breast cancer
Source: PubMed Central journal article supplement — ESMO Open. 2020 Apr 15;5(2):e000640. doi: 10.1136/esmoopen-2019-000640 (PMC7082639; doi:10.1136/esmoopen-2019-000640), 2020-04-15

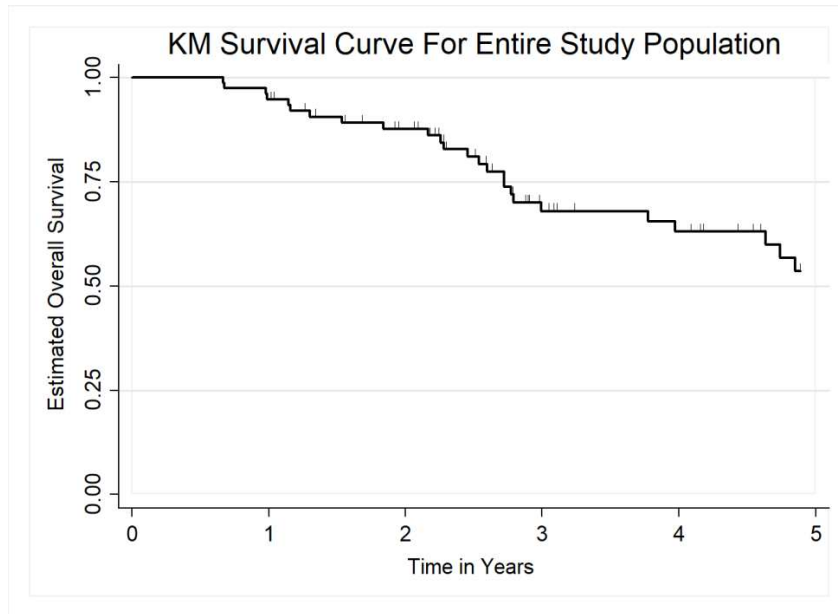

Figure 2: overall survival

Supplement: esmoopen-2019-000640supp002.pdf [file esmoopen-2019-000640supp002.pdf]
